# Supplementary material for: FTO-Dependent N 6 -Methyladenosine Modifications Inhibit Ovarian Cancer Stem Cell Self-Renewal by Blocking cAMP Signaling
Source: Oxford University Press journal article supplement (doi:10.1158/0008-5472.can-19-4044), 2020-06-30
Supplement: 00085472can194044-sup-234830_3_supp_6369283_qccdh8.doc [file 00085472can194044-sup-234830_3_supp_6369283_qccdh8.doc]

**Supplemental Tables**

**FTO-Dependent *N6*-Methyladenosine Modifications Inhibit Ovarian Cancer Stem Cell Self-Renewals by Blocking cAMP Signaling**

Hao Huang, Yinu Wang, Manoj Kandpal, Guangyuan Zhao, Horacio Cardenas, Yanrong Ji, Anusha Chaparala, Edward J. Tanner, Jianjun Chen, Ramana V. Davuluri, Daniela Matei

Table S1. List of primersoligonucleotides

| Target gene | Forward primer (5’to 3’) | Reverse primer (5’to 3’) | Position in human hg38 |
| --- | --- | --- | --- |
| 18S_qPCR | ACCCGTTGAACCCCATTCGTGA | GCCTCACTAAACCATCCAATCGG | 110657-110815 |
| Nanog_qPCR | GATGCCTCACACGGAGACT | TTTGCGACACTCTTCTCTGC | 7789746-7793055 |
| Oct4_qPCR | CTTCGCAAGCCCTCATTTC | GAGAAGGCGAAATCCGAAG | 31170586-31170673 |
| Sox2_qPCR | TGCTGCCTCTTTAAGACTAGGAC | CCTGGGGCTCAAACTTCTCT | 181712010-181712084 |
| ALDH1A1_qPCR | AGGGGCAGCCATTTCTTCTCA | CACGGGCCTCCTCCACATT | 72912034-72924079 |
| METTL3_qPCR | CAAGGAGGAGTGCATGAAAG | GGAAAGAGCAGTCACCTAAAG | 21501080-21501787 |
| METTL14_qPCR | TTTCATCAGGGATGTAGGTTTAG | CATGGGAGGAGTGTTAGATTTAG | 118694434-118694523 |
| WTAP_qPCR | CTACTCAAATCCAGTACCTCAAG | CTGTTCCAGTTCACCTTTCA | 51410147-51410265 |
| ALKBH5_qPCR | AGTTCCAGTTCAAGCCTATTC | CCGTATGCAGTGAGTGATTT | 18184935-18194991 |
| FTO_qPCR | GTTCACGGCCTGCACTCAT | CCCTGGCTGCTTTGCTTAAT | 54113413-54113487 |
| PDE4B_qPCR | GGAAACGCTGGAGGAATTAG | CCCGGTTCAGCATTCTTT | 66332533-66355525 |
| PDE1C_qPCR | CATCCATGACTACGAGCATAC | ATCTTGCAGAAGGCGATAAG | 31848015-31850694 |
| PDE4B_m6A | AGGACATTCTCGATACCTTAGA | CTGAAACTTCTCCATCAGACC | 66372383-66372504 |
| PDE1C_m6A | CTGAGAATCCGAGTGGAAAC | TTATTGGTGGAGCAGAACTATG | 31786092-31786200 |

Table S2. Summary of the m6A-seq and RNA-seq

| Sample | Seq Type | Total Reads | Aligned Reads |
| --- | --- | --- | --- |
| GFP_1 | RNA-seq | 28470811 | 24806581 |
| m6A-seq | 23064069 | 19211413 |
| GFP_2 | RNA-seq | 28257545 | 24141052 |
| m6A-seq | 26966415 | 22988862 |
| GFP_3 | RNA-seq | 30404457 | 25709077 |
| m6A-seq | 25393613 | 21334867 |
| FTO_1 | RNA-seq | 27196655 | 23256114 |
| m6A-seq | 21108707 | 17371255 |
| FTO_2 | RNA-seq | 24242303 | 20619801 |
| m6A-seq | 26335232 | 22302593 |
| FTO_3 | RNA-seq | 26798391 | 22944005 |
| m6A-seq | 25334337 | 20711889 |

Table S3. Numbers of spheroids were counted for each cell dilution

| **Cells Number** | **OVCAR5-GFP** | **OVCAR5-FTO** |
| --- | --- | --- |
| 5 | 8/12 | 0/12 |
| 10 | 11/12 | 1/12 |
| 50 | 12/12 | 7/12 |
| 100 | 12/12 | 9/12 |
| 500 | 12/12 | 10/12 |
| 1000 | 12/12 | 10/12 |
| 2000 | 12/12 | 11/12 |
| 5000 | 12/12 | 11/12 |
| CSC-Frequency  (ELDA) | 1/ 4.29  (1/7.19 -1/2.56) | 1/442.87  (1/ 677.36 -1/289.56) |
| P-value* | 1.99 e-43 | |

* CSCs frequencies in OVCAR5-GFP and OVCAR5-FTO were calculated by using the ELDA software.

Table S4. List of 20 genes that exhibit a significant change between control and FTO-overexpressing OVCAR5 cells in m6A peak levels, and abundance of the corresponding mRNA transcripta

| Gene | Patternb (MeRIP-RNA-Seq) | m6A level changec | | | | | | RNA transcript abundance change | |
| --- | --- | --- | --- | --- | --- | --- | --- | --- | --- |
| Peak 1 | | | Peak2 | | |
| Fold | *p* | Loc | Fold | *p* | Loc | Fold | *p* |
| ICAM1 | Hypo-down | 0.770 | 3.16E-67 | 3’UTR | 0.843 | 0.000479 | CDS | 0.536 | 4.9E-21 |
| PDE4B | Hypo-down | 0.823 | 9.12E-10 | 3’UTR |  |  |  | 0.448 | 1.98E-68 |
| CYP26A1 | Hypo-down | 0.716 | 2.45E-05 | 5’UTR |  |  |  | 0.341 | 2.04E-102 |
| PDE1C | Hypo-down | 0.737 | 0.004677 | CDS |  |  |  | 0.356 | 0.000802 |
| SAMD4A | Hypo-down | 0.670 | 7.9E-0.6 | CDS |  |  |  | 0.293 | 0.000802 |
| TACSTD2 | Hypo-up | 0.835 | 0.002512 | CDS |  |  |  | 4.7 | 3.04E-172 |
| BTBD11 | Hypo-up | 0.307 | 0.001514 | CDS |  |  |  | 3.304 | 2.68E-22 |
| CALB2 | Hypo-up | 0.727 | 3.72E-05 | Intron |  |  |  | 3.160 | 4.59E-102 |
| NOG | Hypo-up | 0.721 | 0.004786 | 5’UTR | 0.778 | 0.001479 | CDS | 3.044 | 3.85E-49 |
| PLAU | Hypo-up | 0.850 | 0.000955 | 3’UTR |  |  |  | 2.952 | 7.24E-117 |
| CRABP2 | Hyper-down | 1.306 | 0.001622 | Intron |  |  |  | 0.348 | 3.06E-73 |
| KCTD4 | Hyper-down | 1.457 | 7.59E-05 | CDS |  |  |  | 0.717 | 0.000404 |
| STIP1 | Hyper-down | 1.503 | 1.38E-05 | CDS | 1.120 | 0.003467 | Intron | 0.727 | 4.68E-10 |
| FKBP4 | Hyper-down | 1.212 | 0.000316 | Intron |  |  |  | 0.745 | 7.55E-09 |
| USB1 | Hyper-down | 1.634 | 0.004786 | 3’UTR |  |  |  | 0.802 | 4.25E-06 |
| MYADM | Hyper-up | 1.521 | 0.000269 | 3’UTR |  |  |  | 2.311 | 0.002116 |
| KRT8 | Hyper-up | 1.330 | 1E-10 | CDS |  |  |  | 1.867 | 2.45E-41 |
| CRIM1 | Hyper-up | 2.657 | 0.001413 | 5’UTR |  |  |  | 1.578 | 0.002752 |
| ASPH | Hyper-up | 1.369 | 0.003548 | CDS | 1.104 | 0.004677 | Intron | 1.464 | 1.40E-15 |
| LIMCH1 | Hyper-up | 1.461 | 0.001995 | Intron |  |  |  | 1.461 | 8.94E-12 |

**a** Fold, fold change; Loc, location; 3'UTR*,* 3' untranslated region; 5'UTR*,* 5' untranslated region; CDS, coding region; *p* value.

**b** Hypo-down and Hypo-up refer to the gene has a significant decrease in at least one m6A peak and a significant decrease and increase, respectively; Hyper-down and Hyper-up refer to the gene has a significant increase in at least one m6A peak and a significant decrease and increase, respectively.

**c** Four genes have two m6A peaks exhibiting a significant change

Table S5. List of top 50 hypo-methylation & down-regulated genes

| hgnc_symbol | logFC | FoldChange | PValue | FDR | diff.log2.fc | Peak.FoldChange | Peak.PValue | Peak.fdr |
| --- | --- | --- | --- | --- | --- | --- | --- | --- |
| RGS16 | -1.9634 | 0.256423 | 3.08E-12 | 6.02E-11 | -1.19 | 0.438302861 | 0.000661 | 0.010233 |
| CASKIN1 | -1.74068 | 0.299228 | 4.97E-21 | 2.07E-19 | -0.372 | 0.77271055 | 2.69E-06 | 0.000107 |
| IGFBP5 | -1.60081 | 0.329692 | 1.98E-68 | 7.33E-66 | -0.276 | 0.825877665 | 2.69E-08 | 1.91E-06 |
| CYP26A1 | -1.55055 | 0.34138 | 2.04E-102 | 2.07E-99 | -0.481 | 0.716480825 | 2.45E-05 | 0.000741 |
| PDE1C | -1.46274 | 0.362805 | 7.51E-82 | 3.80E-79 | -0.439 | 0.737645729 | 0.004677 | 0.044668 |
| ARC | -1.35691 | 0.390417 | 2.85E-39 | 3.60E-37 | -0.322 | 0.799960128 | 0.002138 | 0.025119 |
| LTB | -1.33833 | 0.395479 | 3.50E-07 | 3.39E-06 | -0.282 | 0.822450069 | 1.58E-06 | 6.92E-05 |
| CHST11 | -1.21407 | 0.43105 | 4.49E-58 | 1.34E-55 | -0.395 | 0.760489377 | 0.001175 | 0.016218 |
| PDE4B | -1.15633 | 0.448654 | 1.76E-06 | 1.49E-05 | -0.28 | 0.823591017 | 9.12E-10 | 8.91E-08 |
| ADGRB1 | -1.1278 | 0.457612 | 1.17E-09 | 1.64E-08 | -1.16 | 0.447512535 | 4.79E-06 | 0.000186 |
| AP001062.1 | -1.04519 | 0.48458 | 1.39E-08 | 1.67E-07 | -0.738 | 0.599569957 | 0.000603 | 0.00955 |
| HLA-B | -0.9968 | 0.501111 | 1.40E-27 | 9.36E-26 | -0.186 | 0.879039561 | 3.16E-05 | 0.000912 |
| CARD9 | -0.97614 | 0.508337 | 3.50E-24 | 1.86E-22 | -0.769 | 0.586824089 | 1.70E-06 | 7.41E-05 |
| ADAM11 | -0.97549 | 0.508566 | 1.12E-21 | 4.96E-20 | -0.977 | 0.508035071 | 2.34E-05 | 0.000708 |
| BAIAP3 | -0.91383 | 0.530774 | 8.44E-31 | 6.74E-29 | -0.651 | 0.636838738 | 1.91E-07 | 1.07E-05 |
| MTSS1 | -0.89079 | 0.539318 | 3.50E-41 | 4.95E-39 | -0.652 | 0.636397468 | 7.76E-05 | 0.00195 |
| TOX2 | -0.88258 | 0.542398 | 8.46E-33 | 7.82E-31 | -0.753 | 0.593368399 | 0.002239 | 0.025704 |
| SLC29A4 | -0.87492 | 0.545284 | 1.18E-29 | 9.11E-28 | -0.856 | 0.552482242 | 2.04E-05 | 0.000631 |
| PDE4B | -0.86835 | 0.547774 | 5.00E-22 | 2.26E-20 | -0.78 | 0.582366793 | 0.001698 | 0.02138 |
| SLC9A3 | -0.86806 | 0.547883 | 7.00E-12 | 1.31E-10 | -0.486 | 0.71400199 | 6.31E-12 | 9.55E-10 |
| C1R | -0.85904 | 0.551319 | 2.21E-26 | 1.34E-24 | -0.304 | 0.810003474 | 2.00E-05 | 0.000617 |
| SPEG | -0.84833 | 0.555426 | 9.52E-20 | 3.65E-18 | -0.568 | 0.674551267 | 3.31E-07 | 1.78E-05 |
| RPRML | -0.84738 | 0.555794 | 5.46E-05 | 0.000336 | -0.694 | 0.61813763 | 0.001698 | 0.02138 |
| SAMD4A | -0.8244 | 0.564716 | 1.44E-26 | 8.92E-25 | -0.577 | 0.670356296 | 7.94E-06 | 0.000288 |
| ICAM1 | -0.82319 | 0.565192 | 9.78E-35 | 1.04E-32 | -0.359 | 0.779704843 | 3.16E-63 | 3.98E-60 |
| PLCH2 | -0.81416 | 0.568738 | 4.90E-05 | 0.000305 | -1.53 | 0.346277367 | 0.001047 | 0.014791 |
| CENPS-CORT | -0.8043 | 0.572641 | 0.004475 | 0.016033 | -0.406 | 0.754712984 | 0.000363 | 0.006457 |
| NES | -0.7987 | 0.574869 | 7.06E-27 | 4.51E-25 | -0.254 | 0.838568184 | 8.32E-06 | 0.000295 |
| SMO | -0.79587 | 0.575994 | 5.72E-15 | 1.44E-13 | -0.731 | 0.602486157 | 0.002818 | 0.030903 |
| MAP1A | -0.76723 | 0.587544 | 7.90E-09 | 9.92E-08 | -0.898 | 0.536630143 | 0.000661 | 0.010233 |
| ENTPD1 | -0.68401 | 0.622432 | 6.10E-07 | 5.60E-06 | -0.822 | 0.565657231 | 0.000407 | 0.007079 |
| GDF11 | -0.68333 | 0.622726 | 5.02E-16 | 1.41E-14 | -0.676 | 0.625898229 | 0.00257 | 0.02884 |
| SLC9A3-AS1 | -0.68282 | 0.622945 | 2.65E-22 | 1.23E-20 | -0.357 | 0.780786493 | 3.98E-18 | 1.26E-15 |
| A4GALT | -0.67857 | 0.624785 | 9.32E-08 | 9.85E-07 | -0.397 | 0.759435845 | 0.002344 | 0.026915 |
| COMTD1 | -0.66807 | 0.629348 | 1.98E-14 | 4.76E-13 | -0.454 | 0.730016005 | 4.37E-05 | 0.001202 |
| MEX3A | -0.66441 | 0.630946 | 4.75E-14 | 1.10E-12 | -0.52 | 0.697371833 | 0.00389 | 0.038905 |
| APOE | -0.65768 | 0.633899 | 7.16E-09 | 9.04E-08 | -0.0887 | 0.940369727 | 5.13E-06 | 0.000195 |
| FAM222A | -0.65229 | 0.636271 | 6.63E-05 | 0.000398 | -0.697 | 0.616853585 | 0.000251 | 0.005012 |
| OPRL1 | -0.65025 | 0.637172 | 3.62E-05 | 0.000233 | -0.886 | 0.541112322 | 0.000372 | 0.006607 |
| CLK2 | -0.64832 | 0.638021 | 5.39E-11 | 9.04E-10 | -0.294 | 0.815637493 | 0.000692 | 0.010715 |
| TRIB2 | -0.62119 | 0.650136 | 4.07E-19 | 1.45E-17 | -0.303 | 0.81056512 | 0.000832 | 0.012589 |
| TNRC6C-AS1 | -0.61452 | 0.653146 | 3.39E-14 | 7.94E-13 | -0.226 | 0.855002178 | 0.001175 | 0.016218 |
| LZTS3 | -0.60517 | 0.657395 | 5.14E-09 | 6.64E-08 | -0.527 | 0.69399636 | 6.61E-05 | 0.001698 |
| P3H3 | -0.59689 | 0.661176 | 6.78E-10 | 9.82E-09 | -0.673 | 0.627201102 | 2.57E-09 | 2.34E-07 |
| DAAM2 | -0.58061 | 0.66868 | 1.96E-11 | 3.45E-10 | -0.537 | 0.689202576 | 0.000794 | 0.012023 |
| SQLE | -0.57261 | 0.672399 | 7.37E-08 | 7.91E-07 | -0.229 | 0.853226098 | 1.00E-11 | 1.29E-09 |
| RNASE1 | -0.56982 | 0.673703 | 2.10E-08 | 2.46E-07 | -0.259 | 0.835666959 | 3.98E-17 | 1.26E-14 |
| AL365181.2 | -0.56672 | 0.67515 | 2.34E-05 | 0.000158 | -0.654 | 0.635515845 | 0.004365 | 0.042658 |
| NAB2 | -0.56087 | 0.677896 | 1.46E-11 | 2.64E-10 | -0.488 | 0.713012859 | 0.001698 | 0.02138 |
| FAHD2CP | -0.55683 | 0.679796 | 0.002667 | 0.010305 | -0.847 | 0.555939579 | 5.01E-05 | 0.001318 |

Table S6: List of top 50 hypo-methylation &up-regulated genes

| hgnc_symbol | logFC | FoldChange | PValue | FDR | diff.log2.fc | Peak.FoldChange | Peak.PValue | Peak.fdr |
| --- | --- | --- | --- | --- | --- | --- | --- | --- |
| TACSTD2 | 2.232693 | 4.700106 | 3.04E-172 | 1.53E-168 | -0.259 | 0.835667 | 0.002512 | 0.02884 |
| AC091804.1 | 1.976302 | 3.934833 | 2.85E-10 | 4.35E-09 | -0.966 | 0.511923 | 0.000302 | 0.005754 |
| BTBD11 | 1.724286 | 3.304165 | 2.68E-22 | 1.24E-20 | -1.7 | 0.307786 | 0.001514 | 0.019498 |
| CALB2 | 1.659813 | 3.159755 | 4.59E-102 | 4.35E-99 | -0.459 | 0.72749 | 3.72E-05 | 0.001047 |
| NOG | 1.606058 | 3.044189 | 3.85E-49 | 7.48E-47 | -0.471 | 0.721464 | 0.004786 | 0.045709 |
| PLAU | 1.562085 | 2.952802 | 7.24E-117 | 1.10E-113 | -0.234 | 0.850274 | 0.000955 | 0.013804 |
| BMP4 | 1.516802 | 2.86156 | 1.00E-71 | 4.01E-69 | -0.384 | 0.76631 | 1.05E-05 | 0.000363 |
| KLF4 | 1.477848 | 2.785329 | 0.002665 | 0.0103 | -0.525 | 0.694959 | 0.003236 | 0.034674 |
| ADRB2 | 1.45657 | 2.744551 | 4.15E-06 | 3.28E-05 | -0.849 | 0.555169 | 0.005129 | 0.048978 |
| FILIP1L | 1.430216 | 2.694871 | 7.08E-56 | 1.79E-53 | -0.306 | 0.808881 | 0.003311 | 0.034674 |
| ARHGAP29 | 1.395781 | 2.63131 | 1.18E-86 | 6.55E-84 | -0.332 | 0.794434 | 2.95E-06 | 0.00012 |
| KLF6 | 1.372817 | 2.589758 | 0.015377 | 0.045223 | -0.493 | 0.710546 | 0.003236 | 0.033884 |
| PIM1 | 1.258037 | 2.391701 | 0.014283 | 0.042618 | -0.676 | 0.625898 | 0.000955 | 0.013804 |
| PADI1 | 1.204857 | 2.305144 | 1.30E-17 | 4.12E-16 | -0.784 | 0.580754 | 0.000513 | 0.008511 |
| ROR1 | 1.124429 | 2.180152 | 1.03E-15 | 2.81E-14 | -0.575 | 0.671286 | 0.001072 | 0.015136 |
| NRP1 | 1.106217 | 2.152804 | 4.42E-57 | 1.27E-54 | -0.337 | 0.791686 | 0.001202 | 0.016596 |
| BCL9L | 1.099926 | 2.143437 | 5.87E-49 | 1.13E-46 | -0.69 | 0.619854 | 0.001479 | 0.019498 |
| ARL4C | 1.065029 | 2.092212 | 3.36E-05 | 0.000218 | -0.249 | 0.841479 | 0.002754 | 0.030903 |
| PCDHGB7 | 1.063221 | 2.089592 | 3.58E-12 | 6.95E-11 | -0.835 | 0.560583 | 0.00263 | 0.029512 |
| SMIM10 | 1.060176 | 2.085186 | 2.16E-21 | 9.25E-20 | -0.417 | 0.74898 | 0.000646 | 0.01 |
| DSP | 1.053709 | 2.075859 | 3.30E-40 | 4.39E-38 | -0.395 | 0.760489 | 0.003631 | 0.037154 |
| ETS2 | 1.051327 | 2.072435 | 7.80E-17 | 2.35E-15 | -0.699 | 0.615999 | 0.000195 | 0.004074 |
| AC148477.2 | 1.03011 | 2.04218 | 2.63E-09 | 3.51E-08 | -0.682 | 0.623301 | 0.000234 | 0.004677 |
| MACF1 | 1.027786 | 2.038893 | 7.58E-42 | 1.11E-39 | -0.372 | 0.772711 | 9.55E-07 | 4.47E-05 |
| SIK2 | 1.023058 | 2.032222 | 1.40E-38 | 1.71E-36 | -0.801 | 0.573951 | 0.00049 | 0.008128 |
| PROSER2 | 1.012975 | 2.018068 | 2.44E-26 | 1.47E-24 | -0.328 | 0.79664 | 0.002239 | 0.026303 |
| LIMA1 | 1.001996 | 2.002769 | 1.70E-31 | 1.42E-29 | -0.319 | 0.801625 | 0.00011 | 0.00257 |
| KCNK1 | 0.995356 | 1.993572 | 9.45E-24 | 4.89E-22 | -0.72 | 0.607097 | 0.001318 | 0.017783 |
| ARHGAP5-AS1 | 0.988636 | 1.984308 | 2.23E-09 | 3.00E-08 | -0.998 | 0.500694 | 0.000288 | 0.005495 |
| ITGA3 | 0.98845 | 1.984052 | 1.46E-47 | 2.61E-45 | -0.423 | 0.745872 | 2.00E-51 | 2.00E-48 |
| PCYT2 | 0.955801 | 1.939656 | 1.16E-28 | 8.33E-27 | -0.421 | 0.746907 | 8.32E-05 | 0.002089 |
| KRT18 | 0.95324 | 1.936216 | 1.64E-29 | 1.23E-27 | -0.233 | 0.850864 | 5.01E-14 | 1.00E-11 |
| AHNAK2 | 0.95308 | 1.936001 | 8.23E-40 | 1.08E-37 | -0.575 | 0.671286 | 0.000363 | 0.006457 |
| OGFRL1 | 0.948241 | 1.929518 | 2.13E-35 | 2.32E-33 | -0.286 | 0.820173 | 0.000339 | 0.006166 |
| NNMT | 0.930195 | 1.905534 | 9.73E-20 | 3.72E-18 | -0.243 | 0.844986 | 0.000123 | 0.002818 |
| THSD7A | 0.927414 | 1.901864 | 4.80E-23 | 2.34E-21 | -0.724 | 0.605417 | 0.000832 | 0.012589 |
| MUC4 | 0.912036 | 1.881699 | 1.24E-15 | 3.35E-14 | -0.666 | 0.630252 | 0.004786 | 0.045709 |
| PODXL | 0.904005 | 1.871254 | 2.86E-40 | 3.87E-38 | -0.415 | 0.750019 | 0.000135 | 0.00302 |
| AJUBA | 0.898001 | 1.863482 | 4.71E-35 | 5.06E-33 | -0.329 | 0.796088 | 0.000661 | 0.010233 |
| PRNP | 0.897324 | 1.862608 | 4.91E-34 | 4.96E-32 | -0.213 | 0.862741 | 0.000219 | 0.004365 |
| BCL2L1 | 0.896358 | 1.861361 | 1.79E-33 | 1.75E-31 | -0.201 | 0.869947 | 0.000263 | 0.005129 |
| ZBTB18 | 0.883831 | 1.845269 | 2.03E-32 | 1.83E-30 | -0.256 | 0.837406 | 9.33E-06 | 0.000324 |
| CSF1 | 0.882268 | 1.843271 | 9.20E-39 | 1.14E-36 | -0.4 | 0.757858 | 3.16E-16 | 7.94E-14 |
| MYC | 0.880715 | 1.841288 | 3.33E-09 | 4.41E-08 | -0.191 | 0.875998 | 4.68E-08 | 3.09E-06 |
| TPBG | 0.877384 | 1.837041 | 4.16E-18 | 1.37E-16 | -0.364 | 0.777007 | 6.46E-05 | 0.00166 |
| ITPK1 | 0.873882 | 1.832587 | 4.18E-37 | 4.99E-35 | -0.276 | 0.825878 | 0.00309 | 0.033113 |
| PVR | 0.873142 | 1.831648 | 1.72E-32 | 1.57E-30 | -0.359 | 0.779705 | 7.94E-12 | 1.23E-09 |
| HIC1 | 0.870929 | 1.828841 | 8.23E-29 | 6.00E-27 | -0.6 | 0.659754 | 0.001622 | 0.020893 |
| ZFP36L1 | 0.868954 | 1.826338 | 4.70E-05 | 0.000293 | -0.422 | 0.746389 | 0.000229 | 0.004571 |
| PLEC | 0.862004 | 1.817562 | 3.58E-33 | 3.44E-31 | -0.394 | 0.761017 | 1.00E-12 | 1.51E-10 |
| CYP1B1 | 0.858485 | 1.813133 | 8.54E-21 | 3.46E-19 | -0.461 | 0.726483 | 0.00309 | 0.033113 |
| ARHGAP23 | 0.858468 | 1.813111 | 3.04E-34 | 3.15E-32 | -0.492 | 0.711039 | 1.58E-10 | 1.86E-08 |
